# Supplementary material for: Co-circulation of different A. phagocytophilum variants within cattle herds and possible reservoir role for cattle
Source: PubMed Central journal article supplement (PMC5845262; doi:10.1186/s13071-018-2661-7), 2018-03-09
Supplement: 13071_2018_2661_MOESM4_ESM.pdf [file 13071_2018_2661_MOESM4_ESM.pdf]

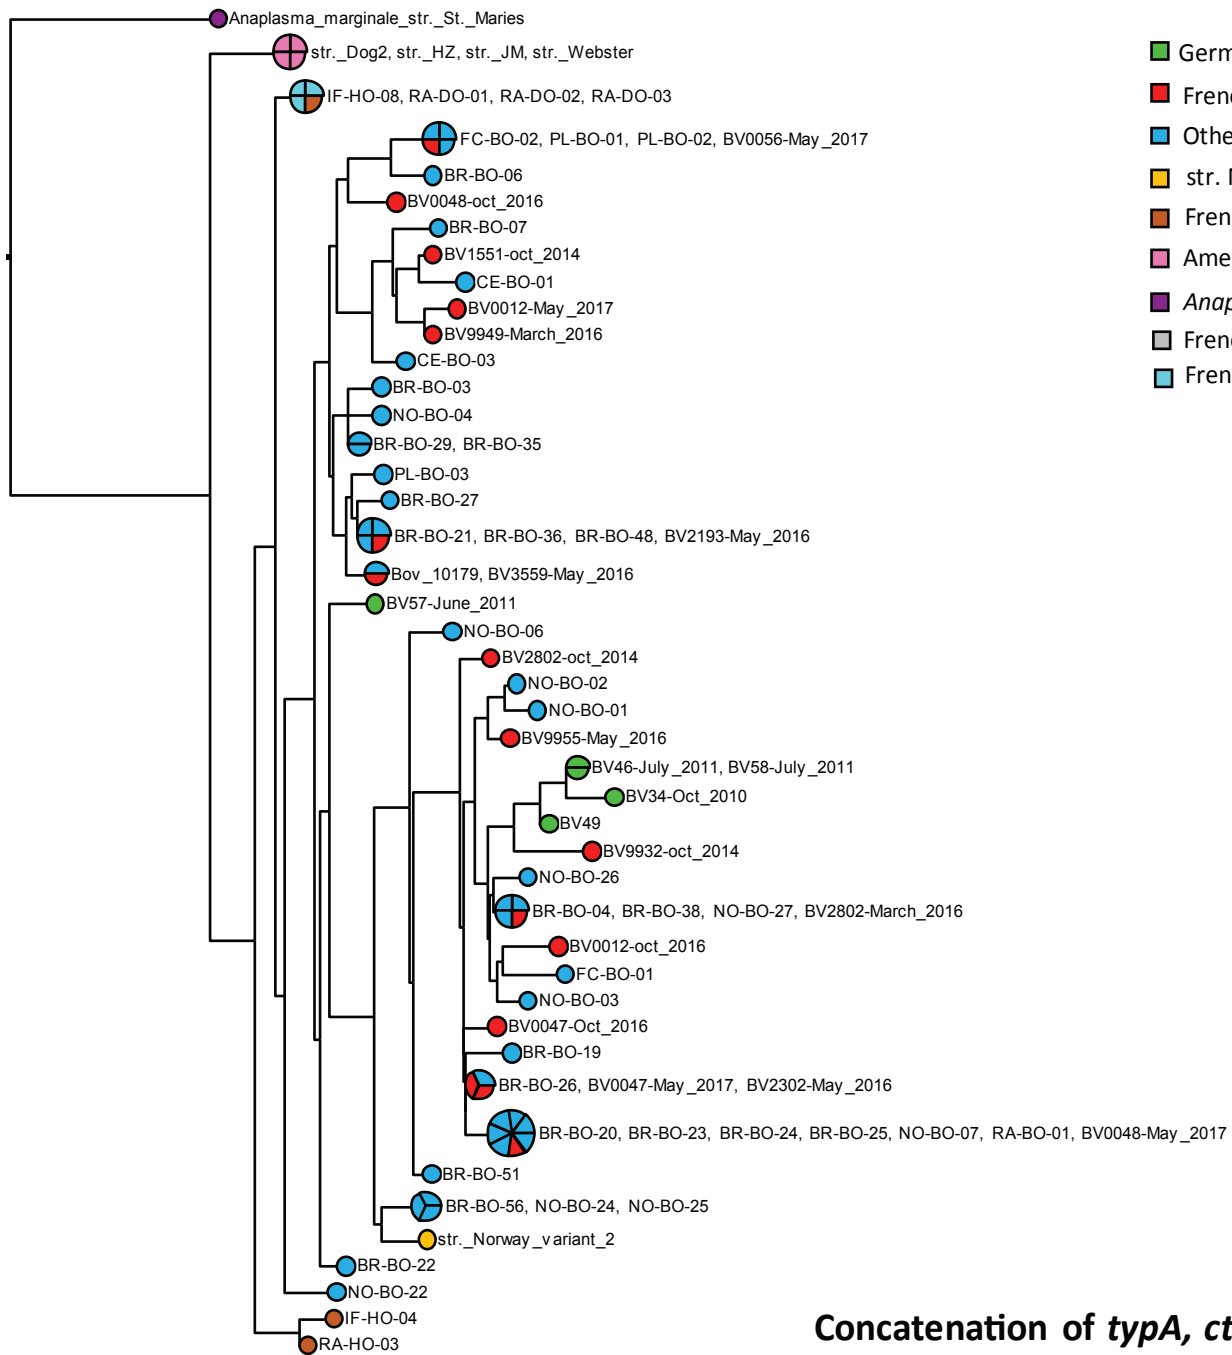

- German cattle isolates (our study)
- French cattle isolates (our study)
- Other French cattle isolates
- str. Norway variant2
- French horse isolates
- American strains (human and canine)
- *Anaplasma marginale* (str. St. Maries)
- French roe deer isolates
- French dog isolates

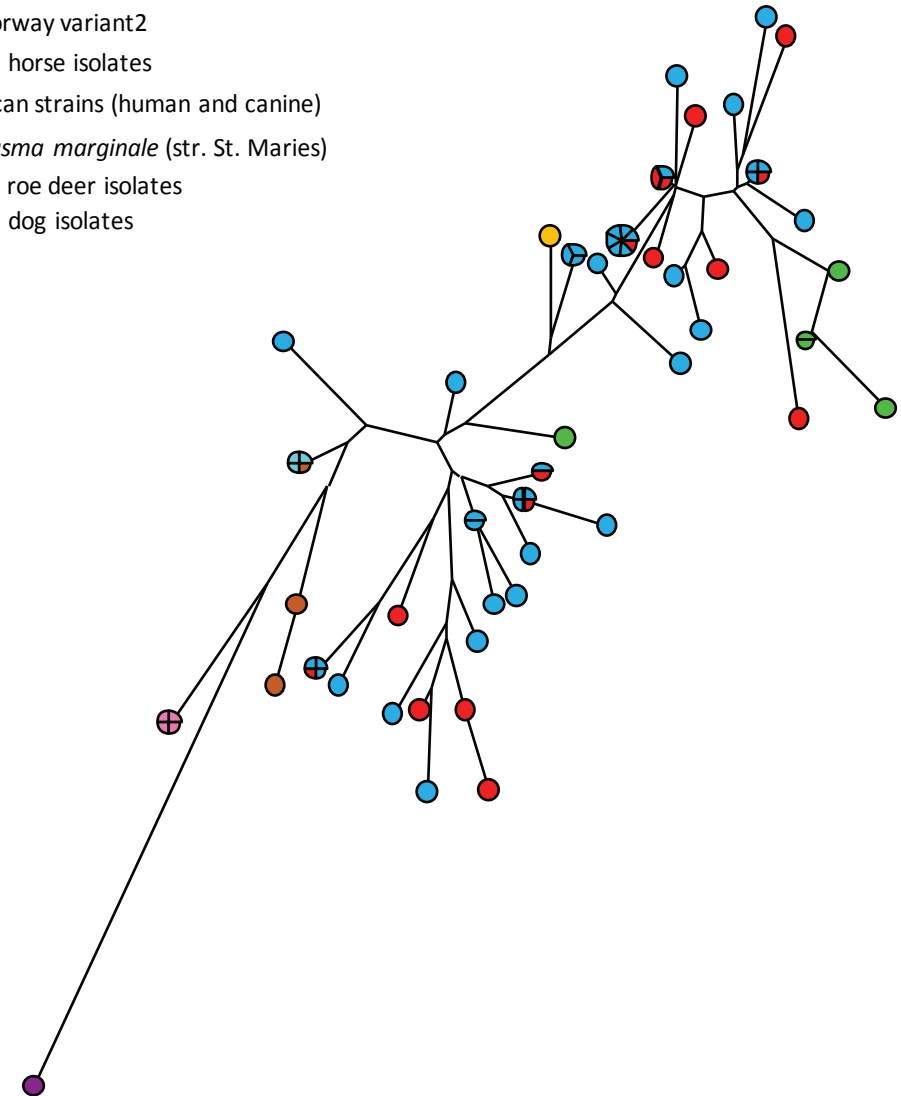

Concatenation of *typA*, *ctrA*, *msp4* and *recG*
